# Supplementary material for: Design and in vitro/in vivo evaluations of a multiple-drug-containing gingiva disc for periodontotherapy
Source: Royal Society of Chemistry journal article supplement (doi:10.1039/c9ra09569a), 2020-01-01
Supplement: c9ra09569a1.pdf [file c9ra09569a1.pdf]

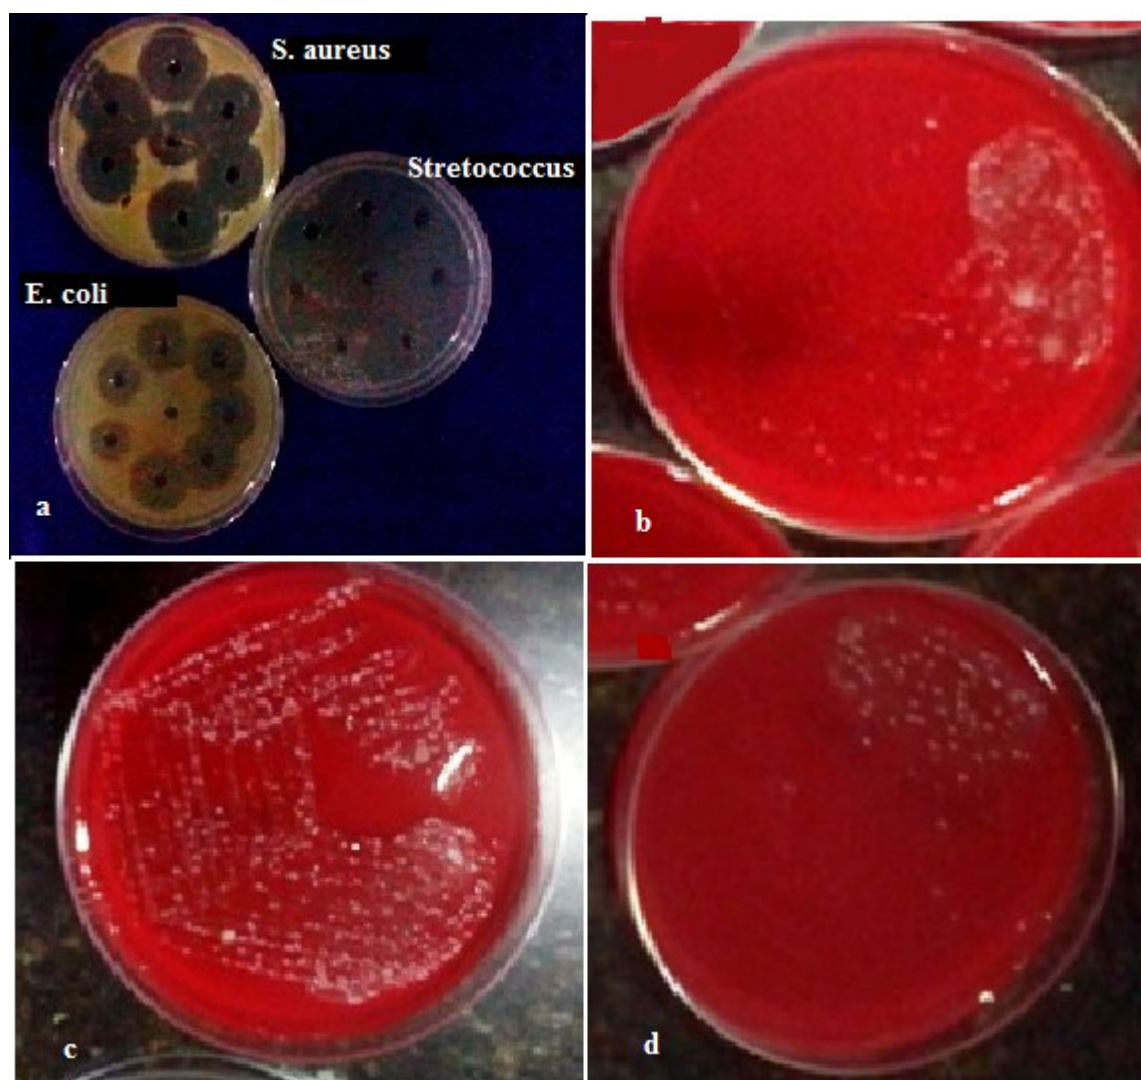

Pictorial presentation of *in-vitro* antimicrobial efficacy study (a) and *in-vivo* antimicrobial efficacy study (b,c and d).
